# Supplementary material for: Relation between Height Loss and Cardiovascular Disease: Data from Large Korean Cohort
Source: Research Square preprint supplement (doi:10.21203/rs.3.rs-857902/v2), 2022-04-04
Supplement: Supplementary file 1 [file f5416b6e332dd80f4905cedc.docx]

**Supplementary Table 1.** **The cumulative incidence rates of major adverse cardiovascular and cerebral events per the annual height decrease rate in subjects aged ≥60 years**

|  | All | | | | | | Male | | | | | | Female | | | | | |
| --- | --- | --- | --- | --- | --- | --- | --- | --- | --- | --- | --- | --- | --- | --- | --- | --- | --- | --- |
|  | Annual rate of height decrease** | | | | | | Annual rate of height decrease** | | | | | | Annual rate of height decrease** | | | | | |
|  | Group1 | | Group2 | | Group3 | | Group1 | | Group2 | | Group3 | | Group1 | | Group2 | | Group3 | |
|  | (N=42,139) | | (N=8,368) | | (N=3,711) | | (N=20,341) | | (N=3,365) | | (N=1,353) | | (N=21,798) | | (N=5,003) | | (N=2,358) | |
| Accumulative incidence rate* | n | (%) | n | (%) | n | (%) | n | (%) | n | (%) | n | (%) | n | (%) | n | (%) | n | (%) |
| **MACCE** |  |  |  |  |  |  |  |  |  |  |  |  |  |  |  |  |  |  |
| 1st year | 637 | (1.5) | 165 | (2.0) | 83 | (2.2) | 355 | (1.8) | 75 | (2.2) | 32 | (2.4) | 282 | (1.3) | 90 | (1.8) | 51 | (2.2) |
| 2nd year | 1,295 | (3.1) | 306 | (3.7) | 148 | (4.0) | 706 | (3.5) | 135 | (4.0) | 58 | (4.3) | 589 | (2.7) | 171 | (3.4) | 90 | (3.8) |
| 3rd year | 1,923 | (4.6) | 457 | (5.5) | 244 | (6.6) | 1,033 | (5.1) | 194 | (5.8) | 98 | (7.2) | 890 | (4.1) | 263 | (5.3) | 146 | (6.2) |
| 4th year | 2,646 | (6.3) | 620 | (7.4) | 329 | (8.9) | 1,439 | (7.1) | 258 | (7.7) | 133 | (9.8) | 1,207 | (5.5) | 362 | (7.2) | 196 | (8.3) |
| Cardiac death |  |  |  |  |  | 0.0 |  |  |  |  |  |  |  |  |  |  |  |  |
| 1st year | 22 | (0.1) | 5 | (0.1) | 6 | (0.2) | 16 | (0.1) | 3 | (0.1) | 3 | (0.2) | 6 | (0.03) | 2 | (0.04) | 3 | (0.1) |
| 2nd year | 69 | (0.2) | 11 | (0.1) | 8 | (0.2) | 47 | (0.2) | 6 | (0.2) | 5 | (0.4) | 22 | (0.1) | 5 | (0.1) | 3 | (0.1) |
| 3rd year | 122 | (0.3) | 24 | (0.3) | 21 | (0.6) | 77 | (0.4) | 11 | (0.3) | 10 | (0.7) | 45 | (0.2) | 13 | (0.3) | 11 | (0.5) |
| 4th year | 201 | (0.5) | 43 | (0.5) | 38 | (1.0) | 123 | (0.6) | 20 | (0.6) | 16 | (1.2) | 78 | (0.4) | 23 | (0.5) | 22 | (0.9) |
| Non-fatal MI |  |  |  |  |  | 0.0 |  |  |  |  |  |  |  |  |  |  |  |  |
| 1st year | 77 | (0.2) | 25 | (0.3) | 8 | (0.2) | 55 | (0.3) | 16 | (0.5) | 4 | (0.3) | 22 | (0.1) | 9 | (0.2) | 4 | (0.2) |
| 2nd year | 148 | (0.4) | 41 | (0.5) | 15 | (0.4) | 95 | (0.5) | 24 | (0.7) | 6 | (0.4) | 53 | (0.2) | 17 | (0.3) | 9 | (0.4) |
| 3rd year | 232 | (0.6) | 58 | (0.7) | 29 | (0.8) | 145 | (0.7) | 33 | (1.0) | 15 | (1.1) | 87 | (0.4) | 25 | (0.5) | 14 | (0.6) |
| 4th year | 318 | (0.8) | 77 | (0.9) | 38 | (1.0) | 207 | (1.0) | 40 | (1.2) | 18 | (1.3) | 111 | (0.5) | 37 | (0.7) | 20 | (0.9) |
| Stroke |  |  |  |  |  | 0.0 |  |  |  |  |  |  |  |  |  |  |  |  |
| 1st year | 529 | (1.3) | 139 | (1.7) | 62 | (1.7) | 284 | (1.4) | 62 | (1.8) | 22 | (1.6) | 245 | (1.1) | 77 | (1.5) | 40 | (1.7) |
| 2nd year | 1,063 | (2.5) | 253 | (3.0) | 121 | (3.3) | 568 | (2.8) | 107 | (3.2) | 46 | (3.4) | 495 | (2.3) | 146 | (2.9) | 75 | (3.2) |
| 3rd year | 1,559 | (3.7) | 367 | (4.4) | 187 | (5.0) | 822 | (4.0) | 149 | (4.4) | 70 | (5.2) | 737 | (3.4) | 218 | (4.4) | 117 | (5.0) |
| 4th year | 2,091 | (5.0) | 487 | (5.8) | 243 | (6.6) | 1,112 | (5.5) | 197 | (5.9) | 94 | (7.0) | 979 | (4.5) | 290 | (5.8) | 149 | (6.3) |
| Hospitalization for HF |  |  |  |  |  | 0.0 |  |  |  |  |  |  |  |  |  |  |  |  |
| 1st year | 44 | (0.1) | 8 | (0.1) | 8 | (0.2) | 26 | (0.1) | 4 | (0.1) | 3 | (0.2) | 18 | (0.1) | 4 | (0.1) | 5 | (0.2) |
| 2nd year | 90 | (0.2) | 22 | (0.3) | 13 | (0.4) | 48 | (0.2) | 14 | (0.4) | 6 | (0.4) | 42 | (0.2) | 8 | (0.2) | 7 | (0.3) |
| 3rd year | 135 | (0.3) | 41 | (0.5) | 25 | (0.7) | 71 | (0.4) | 21 | (0.6) | 11 | (0.8) | 64 | (0.3) | 20 | (0.4) | 14 | (0.6) |
| 4th year | 208 | (0.5) | 59 | (0.7) | 37 | (1.0) | 107 | (0.5) | 25 | (0.7) | 17 | (1.3) | 101 | (0.5) | 34 | (0.7) | 20 | (0.9) |

MACCE, major adverse cardiovascular and cerebral events; MI, myocardial infarction; HF, heart failure.

*After observing the degrees of height reduction for 10 years form 2002, we annually calculated accumulative incidence rate of MACE from Jan of 2012.

*Group1=0 ≤ annual rate of height decrease＜0.3, Group2=0.3≤ annual rate of height decrease ＜0.6, Group3=0.6≥ annual rate of height decrease, unit (cm)
